# Supplementary material
Source: PubMed Central journal article supplement (PMC6598911)
Supplement: 12250_2017_4077_MOESM1_ESM.pdf [file 12250_2017_4077_MOESM1_ESM.pdf]

## Electronic Supplementary Material

# Extensive evolution analysis of the global chikungunya virus strains revealed the origination of CHIKV epidemics in Pakistan in 2016

Junming Shi<sup>1</sup>, Zhengyuan Su<sup>1</sup>, Zhaojun Fan<sup>1</sup>, Jun Wang<sup>1</sup>, Siqing Liu<sup>1</sup>, Bo Zhang<sup>1</sup>, Hongping Wei<sup>1</sup>, Shoukat Jehan<sup>2</sup>, Nadia Jamil<sup>2</sup>, Shu Shen<sup>1✉</sup>, Fei Deng<sup>1✉</sup>

1. State Key Laboratory of Virology, Wuhan Institute of Virology, Chinese Academy of Sciences, Wuhan 430071, China

2. Centre of Excellence in Science and Applied Technology, Islamabad 44000, Pakistan

Supporting information to DOI: 10.1007/s12250-017-4077-5

Table S1. Primers used for CHIKV genome assembly

| Primer pairs  | Sequence                  | Length of PCR products |
|---------------|---------------------------|------------------------|
| CHIKV-F-1     | ATGGCTGCGTGAGACACACGTAG   | 1374 bp                |
| CHIKV-R-1347  | TTGAATGCCCATAGACARCAGC    |                        |
| CHIKV-F-1308  | GAGAAAGAACACTGACCTGCTG    | 1559 bp                |
| CHIKV-R-2866  | TTGTCTAACTGCGTAACTCCT     |                        |
| CHIKV-F-2705  | GTGGACACTACAGGCTCAACAA    | 1447 bp                |
| CHIKV-R-4151  | GAGGGTTAGCGGCGTTGACT      |                        |
| CHIKV-F-3751  | TCGCATACACCATTAYCAACAG    | 1552 bp                |
| CHIKV-R-5302  | GTTTCTCCCTCGCCTTCTTC      |                        |
| CHIKV-F-5281  | CAGAAGAAGGCGAGGGAGAAAC    | 1533 bp                |
| CHIKV-R-6813  | AGTGAATCATCTTGGCTCTTATC   |                        |
| CHIKV-F-6786  | CCTTTGATAAGAGCCAAGATGA    | 1406 bp                |
| CHIKV-R-8191  | TGCCAGCACCTGTAGGGATG      |                        |
| CHIKV-F-7920  | GCACGAAGGTAAGGTAACAGGT    | 1350 bp                |
| CHIKV-R-9270  | CGGGACCAGAGGGGAGTTAT      |                        |
| CHIKV-F-9032  | CCGAAGAGATAGAGGTACACAT    | 1399 bp                |
| CHIKV-R-10430 | GCAGTTACAGTGATGTTATTTCC   |                        |
| CHIKV-F-10286 | CTGAAAACACGCAGTTGAGC      | 1527 bp                |
| CHIKV-R-11812 | GAAATATTAACAAAATAACATCTCC |                        |

Table S2. Geographic classification of CHIKV

| Geographic division              | Country                             | No. sequence  | Total |
|----------------------------------|-------------------------------------|---------------|-------|
| WA (West Africa)                 | Nigeria                             | 2             | 14    |
|                                  | Senegal                             | 9             |       |
|                                  | Cote d'Ivoire                       | 2             |       |
|                                  | Cameroon                            | 1             |       |
| SEA (South east Asia)            | Indonesia                           | 4             | 92    |
|                                  | Thailand                            | 28            |       |
|                                  | Philippine                          | 7             |       |
|                                  | Malaysia                            | 11            |       |
|                                  | China                               | 17            |       |
|                                  | Myanmar                             | 5             |       |
|                                  | Bangladesh                          | 1             |       |
|                                  | Cambodia                            | 7             |       |
|                                  | Singapore                           | 12            |       |
|                                  | Oceania                             | New Caledonia |       |
| CA (Central America)             | Nicaragua                           | 50            | 50    |
| NA (North America)               | USA                                 | 45            | 46    |
|                                  | Mexico                              | 1             |       |
| CI (Caribbean Island)            | Dominican Republic                  | 9             | 10    |
|                                  | Country                             | 1             |       |
|                                  | Saint Martin                        |               |       |
| SA (South America)               | Brazil                              | 6             | 7     |
|                                  | French Guiana                       | 1             |       |
| ESCA (East/South/Central Africa) | Congo                               | 2             | 16    |
|                                  | South Africa                        | 3             |       |
|                                  | Central African                     | 4             |       |
|                                  | Tanzania                            | 1             |       |
|                                  | Gabon                               | 1             |       |
|                                  | Uganda                              | 1             |       |
|                                  | Angola                              | 1             |       |
|                                  | Yemen                               | 1             |       |
|                                  | Kenya                               | 2             |       |
|                                  | IOL (India and Indian Ocean island) | India         |       |
| Sri Lanka                        |                                     | 20            |       |
| Reunion                          |                                     | 2             |       |
| Mauritius                        |                                     | 2             |       |
| Madagascar                       |                                     | 1             |       |
| Mayotte                          |                                     | 1             |       |
| Comoros                          |                                     | 2             |       |
| Pakistan_2016                    |                                     | Pakistan      | 8     |
| Europe                           | Italy                               | 5             | 6     |
|                                  | France                              | 1             |       |
